# Supplementary material for: Acyclic retinoid and angiotensin-II receptor blocker exert a combined protective effect against diethylnitrosamine-induced hepatocarcinogenesis in diabetic OLETF rats
Source: PubMed Central journal article supplement (PMC6260898; doi:10.1186/s12885-018-5099-6), 2018-11-26

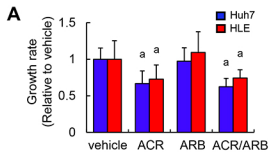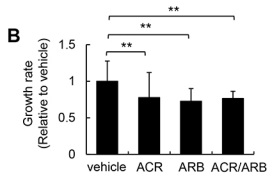

Supplement: 12885_2018_5099_MOESM3_ESM.pdf [file 12885_2018_5099_MOESM3_ESM.pdf]
