# Supplementary material for: Acyclic retinoid and angiotensin-II receptor blocker exert a combined protective effect against diethylnitrosamine-induced hepatocarcinogenesis in diabetic OLETF rats
Source: Springer Nature journal article supplement (doi:10.1186/s12885-018-5099-6), 2018-11-26

**A**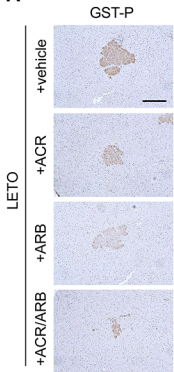**B**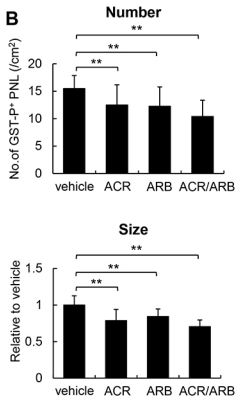

Supplement: MOESM2 [file 16295626]
